# Supplementary material for: Predicting sorption of pharmaceuticals and personal care products onto soil and digested sludge using artificial neural networks
Source: Royal Society of Chemistry journal article supplement (doi:10.1039/b817822d), 2009-01-01

*Electronic Supplementary Information (ESI)*

**Predicting sorption of pharmaceuticals and personal care products onto soil and freeze-dried digested sludge using artificial neural networks**

Leon Barron<sup>a\*</sup>, Josef Havel<sup>b</sup>, Martha Purcell<sup>a</sup>, Michal Szpak<sup>a</sup>, Brian Kelleher<sup>a</sup> and Brett Paull<sup>a</sup>

<sup>a</sup> National Centre for Sensor Research, Dublin City University, Glasnevin, Dublin 9, Republic of Ireland. (\*Email: leon.barron@dcu.ie)

<sup>b</sup> Department of Chemistry, Faculty of Science, Masaryk University, Kotlářská 2, 611 37 Brno, Czech Republic.

**Table of Contents**

|       |                                                                                                  |     |
|-------|--------------------------------------------------------------------------------------------------|-----|
| S 1.0 | Glassware pre-treatment procedures.....                                                          | S3  |
| S 2.0 | Particle size analysis .....                                                                     | S3  |
| S 3.0 | LC-MS/MS conditions and limits of quantification (LOQ) in soil and sludge mixtures.....          | S4  |
| S.4.0 | Sorption kinetics and PLE conditions for solid phase analysis.....                               | S6  |
| S 5.0 | Calculation of $K_d$ by the Freundlich model.....                                                | S10 |
| S 6.0 | Calculation of $D_{ow}$ , the octanol-water distribution ratio and correlations with $K_d$ ..... | S10 |
| S 7.0 | Determination of the organic carbon normalized sorption coefficient, $K_{oc}$ .....              | S10 |
| S 8.0 | Generation of molecular descriptors.....                                                         | S13 |
| S 9.0 | Network architecture.....                                                                        | S19 |

**Sections: 9    Figures: 5    Tables: 5**

*List of Figures*

|           |                                                                                                                                                                                                                                                                                                      |     |
|-----------|------------------------------------------------------------------------------------------------------------------------------------------------------------------------------------------------------------------------------------------------------------------------------------------------------|-----|
| Figure S1 | Particle size distribution of soil sampled from Corrstown, Co. Dublin after drying and sieving. Overall breakdown: 20 % clay, 69 % silt and 11 % sand.....                                                                                                                                           | S3  |
| Figure S2 | (a)-(f) Ratio of PPCP concentration in the liquid phase ( $C_t$ ) to concentration in liquid phase immediately after spiking ( $C_{t0}$ ) versus time.....                                                                                                                                           | S8  |
| Figure S3 | (a) Percentage of the liquid phase reduction in morphine and heroin levels at time, $t$ , versus $t=0$ (b) Solid phase content of morphine and heroin over 0-48 hrs taking into account PLE recovery values for each compared to a theoretical 100 % spiked matrix matched standard $C_s$ (MMS)..... | S9  |
| Figure S4 | Percentage of the total concentration of PPCP in the solid phase ( $C_s(t)$ ) relative to a matrix matched standard ( $C_s$ (MMS); spiked at theoretical 100 % sorption concentration) versus time for 8 PPCPs with raised affinity to sandy-mud soil types.....                                     | S9  |
| Figure S5 | Comparison of $\log K_{oc}$ for PPCPs in soil and sludge sorption experiments.....                                                                                                                                                                                                                   | S12 |
| Figure S6 | Optimized tri-layer neural network for the prediction of $K_d$ in soils and sludges.....                                                                                                                                                                                                             | S19 |

*List of Tables*

|          |                                                                                                                                  |        |
|----------|----------------------------------------------------------------------------------------------------------------------------------|--------|
| Table S1 | MS detection masses/transitions for all test analytes, retention times and limits of quantification in all matrices studied..... | S4/5   |
| Table S2 | Electrospray-ion trap-mass spectrometry conditions.....                                                                          | S6     |
| Table S3 | Recovery data for PLE of solid soils.....                                                                                        | S7     |
| Table S4 | Data for the organic carbon normalized sorption coefficient, $K_{oc}$ , for all compounds studied.....                           | S11    |
| Table S5 | Selection of molecular descriptors as input data for neural network prediction of $K_d$ .....                                    | S13-18 |

## S 1.0 Glassware pretreatment procedures

All glassware was silanised prior to use using a single rinse of 10 % dichlorodimethylsilane solution in dichloromethane followed by twice rinsing with dichloromethane and H<sub>2</sub>O. Any losses due to further adsorption to glassware were noted and final results corrected.

## S 2.0 Particle size analysis

Particle size distribution was performed with use of a Malvern Mastersizer S instrument laser diffraction based granulometer. Air dried samples were sieved through a standard test sieve of 100  $\mu\text{m}$  to remove coarse grains and organic debris and gently pulverised with mortar and pestle. Disagglomeration of grains was achieved by applying ultrasonic energy prior to analysis within the instrument presentation unit. Analysis was performed with moderate stirring and pump speeds. Obscuration of the beam was maintained between 15-30 %. Particle size distributions and physical descriptors were calculated according to the method of moments and the Folk and Ward nomenclature (1). Please refer to Figure S1 for size distribution of soil particles used in this study.

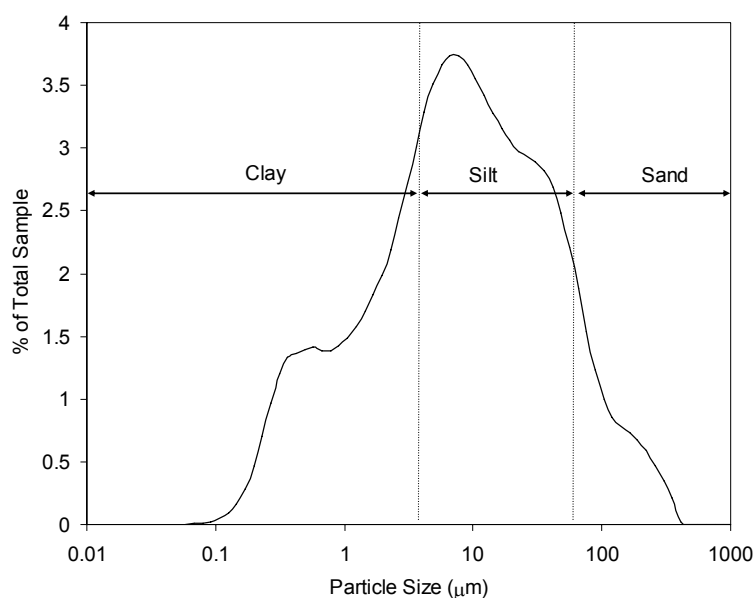

**Figure S1.** Particle size distribution of soil sampled from Corrstown, Co. Dublin after drying and sieving. Overall breakdown: 20 % clay, 69 % silt and 11 % sand.

1. Folk, R.L. and Ward, W.C. Brazos River bar: a study in the significance of grain size parameters. *J. Sediment. Petrol.*, 27 (1957), 3-26.

### S 3.0 LC-MS/MS conditions and limits of quantification (LOQ) in soil/sludge mixtures.

All separations were carried out on a Waters Sunfire 3.5  $\mu\text{m}$ , 150 x 2.1 mm analytical column at a flow rate of 0.2 mL/min. Mobile phases were 10:90 (A) and 80:20 (B) MeCN:10 mM ammonium acetate with a gradient profile as follows: 0-5 min was 100 % A; 5-28 min MeCN raised to 45 %; 28-35 MeCN raised to 80 % and kept constant for a further 10 mins. Re-equilibration time was 15 mins. Injection volumes were 10  $\mu\text{L}$ . Tandem mass spectrometry was carried out on a Bruker-Daltonics Esquire~LC electrospray ion trap mass spectrometer in positive and negative ionisation modes (Table S2). All parent and fragment ions are given in Table S1 along with limits of quantification of the method. Mass spectral LOQ data was generated injecting low concentration matrix matched standards and by calculating a corresponding concentration for a signal to noise ratio of 10:1.

**Table S1** MS detection masses/transitions for all test analytes, retention times and limits of quantification in all matrices studied

| Compound        | $t_r$<br>(min) | MRM<br>Transition<br>or EIC m/z | LOQ<br>water <sup>a</sup> – soil<br>mixture<br>( $\mu\text{g/L}$ ) | LOQ<br>water <sup>a</sup> - sludge<br>mixture<br>( $\mu\text{g/L}$ ) | LOQ<br>water <sup>a</sup><br>only<br>( $\mu\text{g/L}$ ) |
|-----------------|----------------|---------------------------------|--------------------------------------------------------------------|----------------------------------------------------------------------|----------------------------------------------------------|
| Amitriptyline   | 38.6           | 278>233                         | 18                                                                 | 204                                                                  | 5                                                        |
| Amphetamine     | 14.6           | 136>119                         | 160                                                                | -                                                                    | 128                                                      |
| Atenolol        | 6.0            | 267>190                         | 1                                                                  | 4                                                                    | 3                                                        |
| Benzoylcegonine | 17.1           | 290>168                         | 1                                                                  | -                                                                    | 1                                                        |
| Bezafibrate     | 24.8           | 362>316                         | 1                                                                  | -                                                                    | 25                                                       |
| Budesonide      | 36.2           | 431>413                         | 9                                                                  | 68                                                                   | 4                                                        |
| Caffeine        | 10.7           | 195>138                         | 3                                                                  | 30                                                                   | 2                                                        |
| Carbamazepine   | 29.9           | 237>194                         | 0.4                                                                | 4                                                                    | 0.5                                                      |
| Chloramphenicol | 21.4           | 345>275                         | 31                                                                 | -                                                                    | 86                                                       |
| Cimetidine      | 14.2           | 253>211                         | 5                                                                  | -                                                                    | 12                                                       |
| Citalopram      | 33.8           | 325>263                         | 9                                                                  | 12                                                                   | 2                                                        |
| Clofibric Acid* | 19.4           | 213>127                         | 35                                                                 | 37                                                                   | 51                                                       |
| Clotrimazole    | 40.6           | 277>165                         | 2                                                                  | 205                                                                  | 4                                                        |
| Cocaethylene    | 30.2           | 318>196                         | 1                                                                  | -                                                                    | 42                                                       |
| Cocaine         | 26.9           | 304>182                         | 1                                                                  | -                                                                    | 1                                                        |
| Diazepam        | 36.9           | 285>257                         | 1                                                                  | 156                                                                  | 1                                                        |
| Diclofenac*     | 28.0           | 294>250                         | 28                                                                 | -                                                                    | 57                                                       |
| Doxazosin       | 34.0           | 452>344                         | 37                                                                 | 201                                                                  | 3                                                        |
| EDDP            | 40.6           | 278>249                         | 4                                                                  | -                                                                    | 12                                                       |
| Erythromycin    | 41.6           | 734>576                         | 1                                                                  | 5                                                                    | 0.4                                                      |
| Flurbiprofen*   | 26.3           | 199                             | 19                                                                 | 37                                                                   | 10                                                       |
| Heroin          | 27.6           | 370>268                         | 350                                                                | -                                                                    | 1                                                        |

| Compound<br>( <i>contin.</i> ) | $t_r$<br>(min) | MRM<br>Transition<br>or EIC m/z | LOQ <sup>a, b</sup><br>soil-water<br>( $\mu\text{g/L}$ ) | LOQ <sup>a, b</sup><br>sludge-water<br>( $\mu\text{g/L}$ ) | LOQ <sup>a, b</sup><br>water only<br>( $\mu\text{g/L}$ ) |
|--------------------------------|----------------|---------------------------------|----------------------------------------------------------|------------------------------------------------------------|----------------------------------------------------------|
| Indomethacin                   | 29.8           | 358>174                         | 2                                                        | 90                                                         | 4                                                        |
| Ketoprofen                     | 23.4           | 255>209                         | 6                                                        | -                                                          | 13                                                       |
| MDMA                           | 23.0           | 194>163                         | 10                                                       | -                                                          | 5                                                        |
| Metoprolol                     | 38.2           | 268>116                         | 0.4                                                      | 2                                                          | 1                                                        |
| Methadone                      | 22.9           | 310>268                         | 57                                                       | -                                                          | 3                                                        |
| Naproxen*                      | 21.8           | 185>170                         | 14                                                       | 31                                                         | 31                                                       |
| Nifedipine                     | 35.7           | 346                             | 8                                                        | 31                                                         | 17                                                       |
| Nimesulide*                    | 36.6           | 307>229                         | 2                                                        | 15                                                         | 2                                                        |
| Nortriptyline                  | 37.2           | 264>233                         | 8                                                        | 82                                                         | 8                                                        |
| Papaverine                     | 32.8           | 340>202                         | 144                                                      | -                                                          | 2                                                        |
| Paracetamol*                   | 17.9           | 150                             | 45                                                       | 39                                                         | 3                                                        |
| Phenazone                      | 30.6           | 189                             | 1                                                        | 2                                                          | 4                                                        |
| Propranolol                    | 13.5           | 260>116                         | 1                                                        | 30                                                         | 29                                                       |
| Ranitidine                     | 5.1            | 315>270                         | 5                                                        | -                                                          | 20                                                       |
| Salbutamol                     | 5.5            | 240>166                         | 3                                                        | 17                                                         | 17                                                       |
| Salicylic Acid*                | 39.5           | 137>93                          | 250                                                      | 400                                                        | 8                                                        |
| Sertraline                     | 43.2           | 275                             | 11                                                       | 221                                                        | 3                                                        |
| Simvastatin                    | 17.3           | 441>419                         | 18                                                       | 144                                                        | 3                                                        |
| Sulfamethazine                 | 10.5           | 279>156                         | 1                                                        | 6                                                          | 10                                                       |
| Sulfamethoxazole               | 13.3           | 254>156                         | 2                                                        | 11                                                         | 6                                                        |
| Sulfapyridine                  | 41.6           | 250.4                           | 4                                                        | -                                                          | 5                                                        |
| Tamoxifen                      | 43.6           | 373>327                         | 39                                                       | -                                                          | 4                                                        |
| Temazepam                      | 23.3           | 301>283                         | 2                                                        | 170                                                        | 8                                                        |
| Tramadol                       | 42.0           | 264                             | 3                                                        | -                                                          | 4                                                        |
| Triclocarban*                  | 41.8           | 315                             | 64                                                       | n.c.                                                       | 17                                                       |
| Triclosan*                     | 41.8           | 287/289                         | 12                                                       | n.c.                                                       | 32                                                       |
| Trimethoprim                   | 17.1           | 291>123                         | 1                                                        | 8                                                          | 8                                                        |
| Warfarin*                      | 24.2           | 307>161                         | 3                                                        | 11                                                         | 4                                                        |

\* Compounds detected in negative ionisation mode, all others in positive ionization mode.

<sup>a</sup> Data generated from the average of triplicate runs of post-equilibration spiked water-solid mixtures after centrifugation giving an approximate signal to noise ratio of 10:1 with instrument repeatability of  $\leq 20\%$  of peak height.

<sup>b</sup> Water phase contained 10 mM  $\text{CaCl}_2$ .

**Table S2** Electrospray-ion trap-mass spectrometry conditions

| Parameter                             | Negative Mode | Positive Mode |
|---------------------------------------|---------------|---------------|
| Capillary Voltage                     | 4500          | 4500          |
| End Plate Offset (V)                  | -764          | -561          |
| Skimmer 1 (V)                         | -15           | 28.1          |
| Skimmer 2 (V)                         | -4.4          | 6.7           |
| Cap. Exit Offset (V)                  | -50           | 63.7          |
| Octopole (V)                          | -1            | 2.51          |
| Octopole RF (Vpp)                     | 103.3         | 155.3         |
| Octopole Delta (V)                    | -1.36         | 1.98          |
| Lens 1                                | 3.4; 30       | -2.4; -37.8   |
| Trap Drive                            | 22.8          | 34.7          |
| Dry Gas Flow (N <sub>2</sub> ; L/min) | 8             | 8             |
| Nebulizer Pressure (psi)              | 50            | 50            |
| Dry Gas Temp. (°C)                    | 300           | 300           |

#### S 4.0 Sorption kinetics and PLE conditions for solid phase analysis

Freshly silanised flasks were filled with 0.5 g soil and shaken in 20 mL of pre-spiked 1 mg/L solutions of PPCPs in three separate sets and in triplicate. For investigation of sorption kinetics, these were allowed to shake for  $t = 8, 24, 30$  and 48 hours. An additional flask was shaken and sampled immediately to constitute  $t = 0$ . Aliquots of 0.5 mL of the liquid phase were taken and centrifuged at 7,500 rpm for 10 min and analysed by LC-MS/MS. Soil-water mixtures were filtered through Whatman GF/C glass fibre filters to remove suspended matter and the solid portion dried under vacuum for approximately 30 mins. Soil was then transferred to 33 mL PLE cells and extraction was carried out using 50:50 MeOH:H<sub>2</sub>O as the extraction solvent. Temperature and pressure were 60 °C and 1,500 psi respectively for  $n=2$  cycles. Heat and static times were 5 mins each, flush volumes of 100 % and 60 s purge times. Extracts of ~53 mL were then dried under N<sub>2</sub> and reconstituted in 1 mL of 10 mM CaCl<sub>2</sub> solution and analysed directly by LC-MS/MS. Percent recoveries for those compounds studied in solid soils are given in Table S3 for  $n=2$  replicates. Three sets of blanks were also shaken for 24 hours with liquid and solid portions treated in exactly the same way as previously described. Exactly 1 mL of two of the blank aqueous phases were dried under N<sub>2</sub> and reconstituted in standard for matrix matching ( $n=2$ ). The third was run neat. Spiking of neat soils was carried out directly inside PLE cells for calculation of sorbed quantities and for calculation of the approximate extraction recovery. Figure S2 shows the ratio of liquid phase concentration at  $t$  hrs to concentration at 0 hrs (in spiked soil suspension) versus time (hrs). It can be seen

from these sorption kinetics profiles that, in the majority of cases, equilibriums were reached within 24 hrs. Some psychoactive compounds such as morphine and heroin with equilibration times > 24 hrs showed elevated sorption behavior from analysis liquid phases over the 48 hr timescale studied and data led to exaggeratedly large  $K_d$  values for soil-water suspensions (~1300 L/kg). When examining the quantity of heroin and morphine in the solid phase (by taking into account PLE recoveries and comparing to a matrix matched standard), it was observed that actual amounts present were far lower than expected (Figure S3 (b)) and that degradation in liquid phases was most probable and according to first order kinetics (Figure S3 (b)). Heroin showed some sorption behaviour in soils up to ~30% of expected concentration, but again decreased as equilibration time increased. PLE recoveries along with MS/MS quantification limits were insufficient to detect doxazosin to reliably determine stability in solids and data are not included in Figure S3.

**Table S3** Available PPCP recovery data for PLE of solid soils

| Compound <sup>a</sup>  | PLE % Recovery $\pm \sigma^b$ | Compound <sup>a</sup> | PLE % Recovery $\pm \sigma^b$ |
|------------------------|-------------------------------|-----------------------|-------------------------------|
| Temazepam              | 116 $\pm$ 32                  | Bezafibrate           | 54 $\pm$ 1                    |
| Amitriptyline/Morphine | 104 $\pm$ 5                   | Sertraline            | 53 $\pm$ 5                    |
| Clotrimazole           | 101 $\pm$ 25                  | Budesonide            | 53 $\pm$ 2                    |
| Indomethacin           | 101 $\pm$ 5                   | Atenolol              | 50 $\pm$ 3                    |
| Flurbiprofen           | 86 $\pm$ 13                   | Methadone             | 50 $\pm$ 4                    |
| Ketoprofen             | 79 $\pm$ 5                    | Nifedipine            | 46 $\pm$ 2                    |
| Salicylic Acid         | 78 $\pm$ 20                   | Tramadol              | 45 $\pm$ 3                    |
| Warfarin               | 75 $\pm$ 14                   | Carbamazepine         | 41 $\pm$ 4                    |
| Erythromycin           | 72 $\pm$ 6                    | Cocaine               | 40 $\pm$ 1                    |
| Meclofenamic Acid      | 71 $\pm$ 15                   | Heroin                | 36 $\pm$ 1                    |
| Nortriptyline          | 70 $\pm$ 6                    | Sulfamethoxazole      | 29 $\pm$ 2                    |
| Propranolol            | 69 $\pm$ 7                    | Cocaethylene          | 29 $\pm$ 1                    |
| Amphetamine            | 68 $\pm$ 8                    | Clofibric Acid        | 28 $\pm$ 3                    |
| Salbutamol             | 66 $\pm$ 18                   | Caffeine              | 26 $\pm$ 1                    |
| Nimesulide             | 65 $\pm$ 9                    | Phenazone             | 25 $\pm$ 2                    |
| Benzoylcegonine        | 63 $\pm$ 1                    | Sulfapyridine         | 25 $\pm$ 1                    |
| Trimethoprim           | 62 $\pm$ 1                    | Citalopram            | 14 $\pm$ 4                    |
| Diazepam               | 56 $\pm$ 2                    | Sulfamethazine        | 14 $\pm$ 1                    |
| Simvastatin            | 55 $\pm$ 2                    | Papaverine            | 8 $\pm$ 1                     |
| Metoprolol             | 55 $\pm$ 1                    | Ranitidine            | 5 $\pm$ 1                     |
| Naproxen               | 55 $\pm$ 3                    |                       |                               |

<sup>a</sup> Recovery <5 % or data not available (inadequate LODs in solids at the working concentration range) for chloramphenicol, tramadol, cimetidine, triclosan, triclocarban, EDDP and MDMA.

<sup>b</sup> For  $n=2$  replicates compared to a matrix matched standard spiked post extraction at theoretical 100 % extraction concentration.

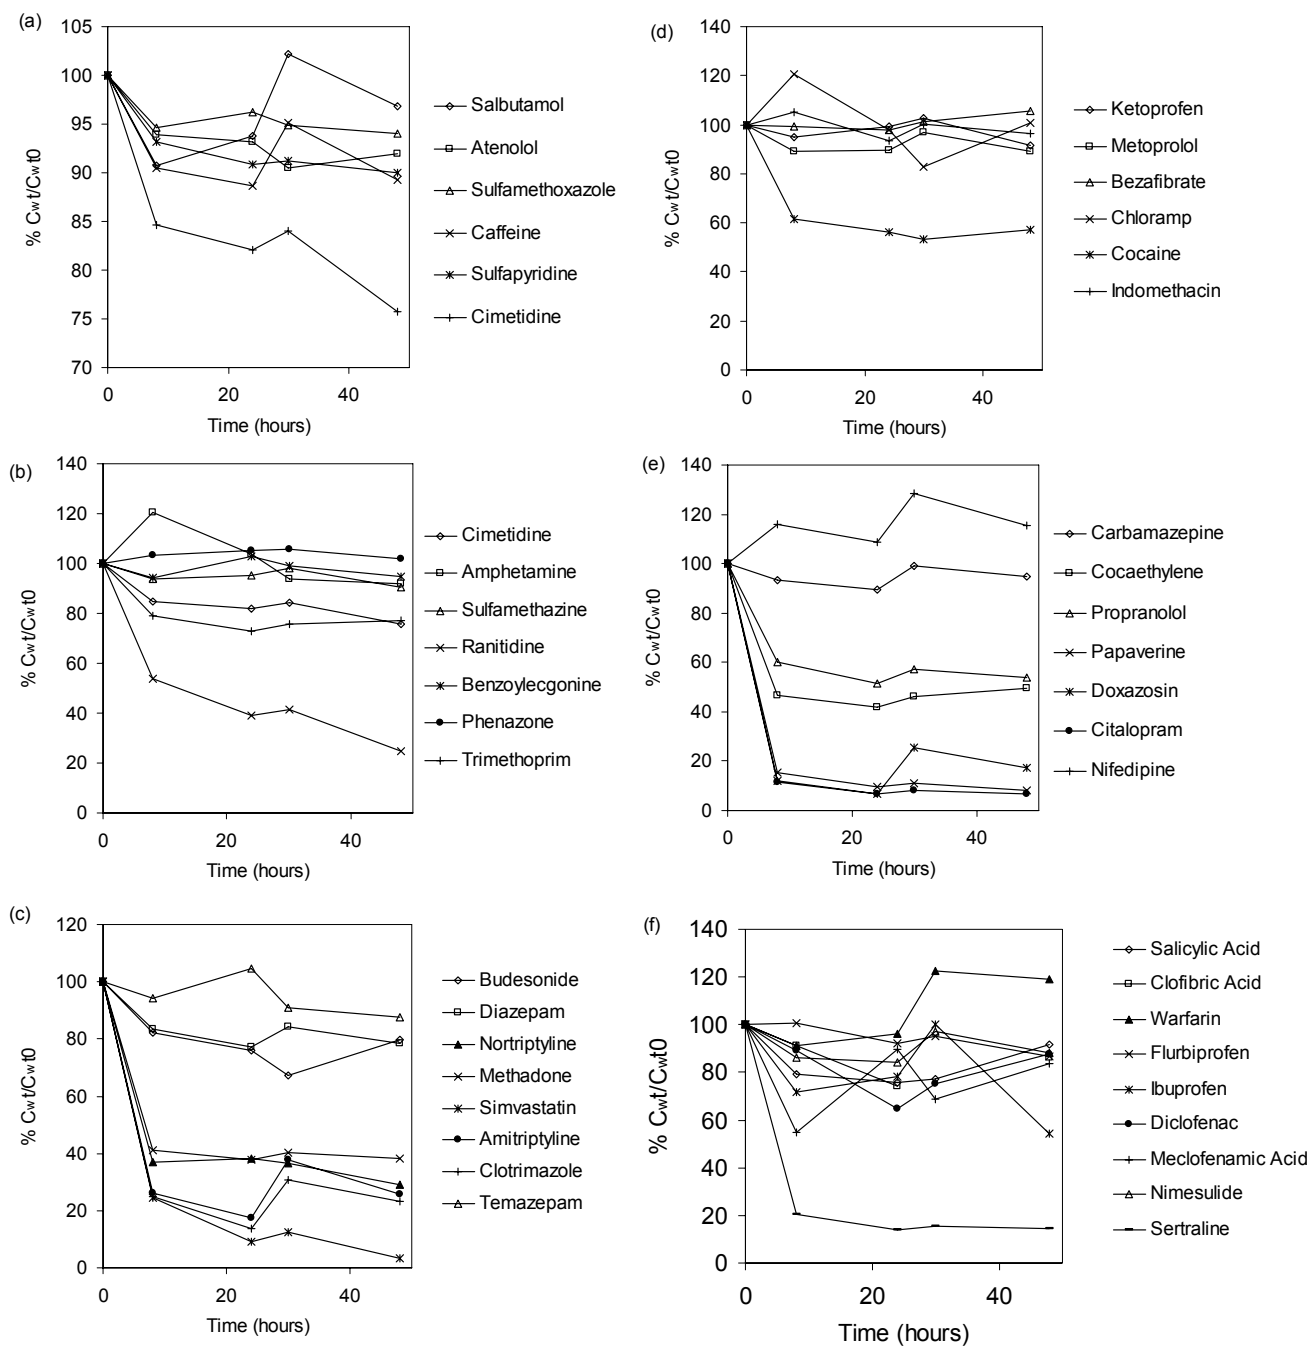

**Figure S2 (a)-(f)** Ratio of PPCP concentration in the liquid phase ( $C_{wt}$ ) to concentration in liquid phase immediately after spiking ( $C_{wt0}$ ) versus time. Data not available for triclosan, triclocarban, erythromycin or simvastatin.



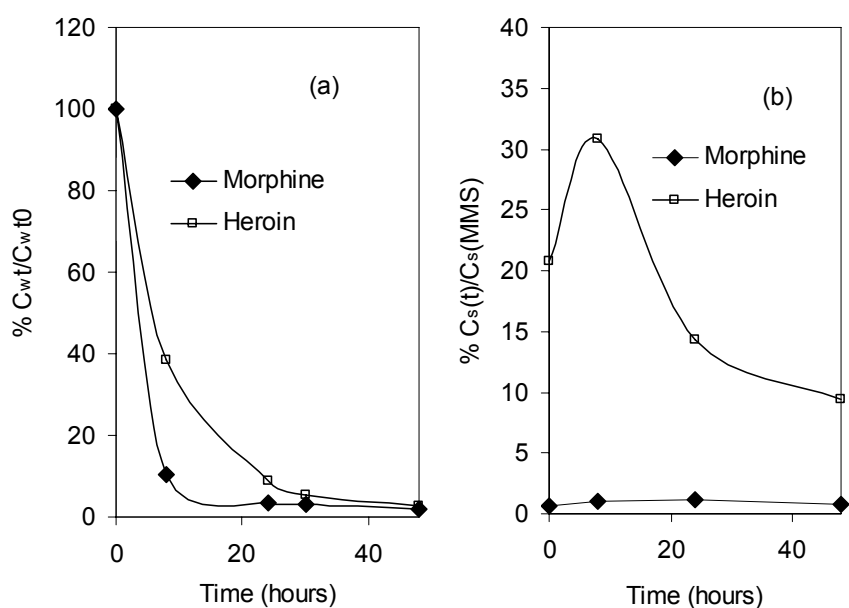

**Figure S3** (a) Percentage of the liquid phase reduction in morphine and heroin levels at time,  $t$ , versus  $t=0$  (b) Solid phase content of morphine and heroin over 0-48 hrs taking into account PLE recovery values for each compared to a theoretical 100 % spiked matrix matched standard  $C_s(MMS)$ .

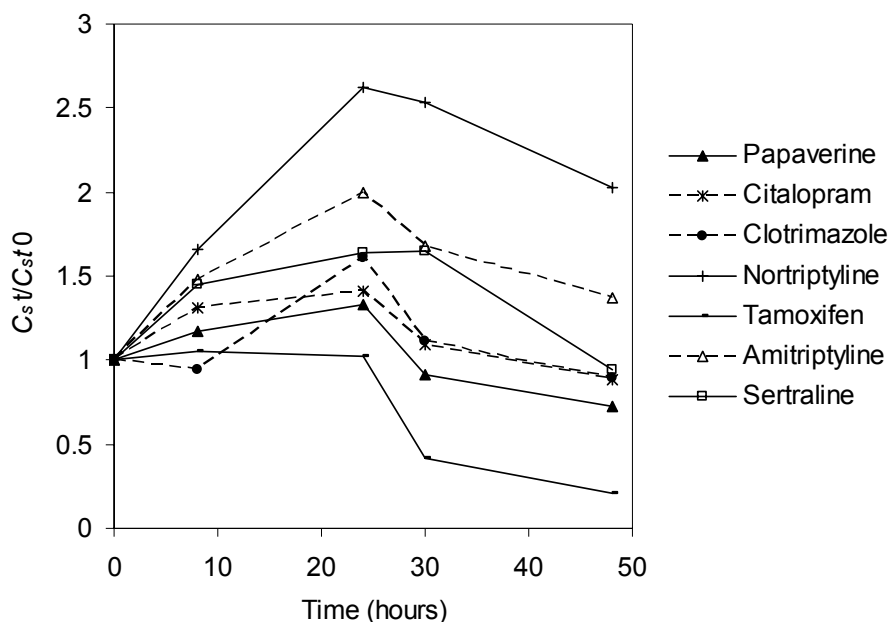

**Figure S4** Possible transformation of selected PPCPs after 24 hrs. Graph represents the ratio of the total concentration of PPCP in the solid phase at  $t = 8, 24, 30$  and  $48$  hrs ( $C_{s,t}$ ) relative to the concentration for  $t=0$  hrs ( $C_{s,t0}$ ).

### S 5.0 Calculation of $K_d$ by the Freundlich model

Aqueous phases were analysed by LC-MS/MS to elucidate  $C_w$  ( $\mu\text{mol/L}$ ) and this value subtracted from the total spiked concentration to determine  $C_s$  ( $\mu\text{mol/kg}$ ). Using these data for each compound, plots of  $\log C_s$  versus  $\log C_w$  were constructed with the slope of the resulting fitting curves taken as  $n$  and intercept taken as  $\log K_f$ . Subsequently,  $K_d$  ( $\text{L/kg}$ ) was calculated from (1) below:

$$K_d = K_f \cdot C_w^{n-1} \quad (1)$$

where  $K_f$  has units of  $\mu\text{mol}^{1-n}\text{L}^n/\text{kg}$ . Calculations for  $K_d$  were calculated for 3 x  $C_w$  concentrations.

### S 6.0 Calculation of $D_{ow}$ , the octanol-water distribution ratio and correlations with $K_d$

The  $D_{ow}$  of all compounds was calculated from (2) below:

$$D_{ow} = \frac{K_{ow}}{1 + 10^{|pH - pK_a|}} \quad (2)$$

where pH was 6.3 in both soil-water and sludge-water mixtures. All data was then correlated with experimentally determined  $K_d$  and shown in Figure S2

### S 7.0 Determination of the organic carbon normalized sorption coefficient, $K_{oc}$

Measured percentage total organic carbon for the sampled soil and freeze-dried sludge were 3.77 % and 30.78 % respectively.  $K_{oc}$  was then calculated using experimentally determined  $K_d$  values using (3)

$$K_{oc} = \frac{K_d}{f_{oc}} \quad (3)$$

where  $f_{oc}$  was the fraction of organic carbon in the sample ( $\text{kg}_{oc}/\text{kg}_{solid}$ )

**Table S4** Data for the organic carbon normalized sorption coefficient,  $K_{oc}$ , for all compounds studied.

| Compound         | $K_{oc}$<br>soil<br>(L/kg <sub>oc</sub> ) | $K_{oc}$<br>sludge<br>(L/kg <sub>oc</sub> ) | Compound         | $K_{oc}$<br>soil<br>(L/kg <sub>oc</sub> ) | $K_{oc}$<br>sludge<br>(L/kg <sub>oc</sub> ) |
|------------------|-------------------------------------------|---------------------------------------------|------------------|-------------------------------------------|---------------------------------------------|
| Amitriptyline    | 3667                                      | 3407                                        | Methadone        | 2262                                      | 60                                          |
| Amphetamine      | 801                                       | -                                           | Metoprolol       | 563                                       | -                                           |
| Atenolol         | 402                                       | 34                                          | Naproxen         | 303                                       | 116                                         |
| Benzoylcegonine  | 774                                       | -                                           | Nifedipine       | 292                                       | 88                                          |
| Bezafibrate      | 396                                       | -                                           | Nimesulide       | 400                                       | 213                                         |
| Budesonide       | 319                                       | 1459                                        | Nortriptyline    | 3231                                      | 1950                                        |
| Caffeine         | 687                                       | 46                                          | Papaverine       | 149929                                    | 62                                          |
| Carbamazepine    | 367                                       | 139                                         | Paracetamol      | 880                                       | -                                           |
| Chloramphenicol  | 1155                                      | -                                           | Phenazone        | 228                                       | 26                                          |
| Cimetidine       | 301                                       | -                                           | Propranolol      | 1608                                      | 1074                                        |
| Citalopram       | 6897                                      | 916                                         | Ranitidine       | 1364                                      | -                                           |
| Clofibrilic Acid | 254                                       | 17                                          | Salbutamol       | 725                                       | 35                                          |
| Clotrimazole     | 28343                                     | 26406                                       | Salicylic Acid   | 2249                                      | 75                                          |
| Cocaethylene     | 716                                       | -                                           | Sertraline       | 3841                                      | 6116                                        |
| Cocaine          | 609                                       | -                                           | Simvastatin      | 2350                                      | 4375                                        |
| Diazepam         | 817                                       | -                                           | Sulfamethazine   | 248                                       | 49                                          |
| Diclofenac       | 243                                       | 340                                         | Sulfamethoxazole | 218                                       | 35                                          |
| Doxazosin        | 68018                                     | 26521                                       | Sulfapyridine    | 218                                       | -                                           |
| EDDP             | 5454                                      | -                                           | Tamoxifen        | 44790                                     | 8229                                        |
| Erythromycin     | 1877                                      | 616                                         | Temazepam        | 684                                       | -                                           |
| Flurbiprofen     | 292                                       | 210                                         | Tramadol         | 610                                       | -                                           |
| Indomethacin     | 895                                       | 694                                         | Triclocarban     | 12053                                     | -                                           |
| Ketoprofen       | 241                                       | -                                           | Triclosan        | 3488                                      | -                                           |
| MDMA             | 480                                       | -                                           | Trimethoprim     | 719                                       | 222                                         |
|                  |                                           |                                             | Warfarin         | 230                                       | 89                                          |

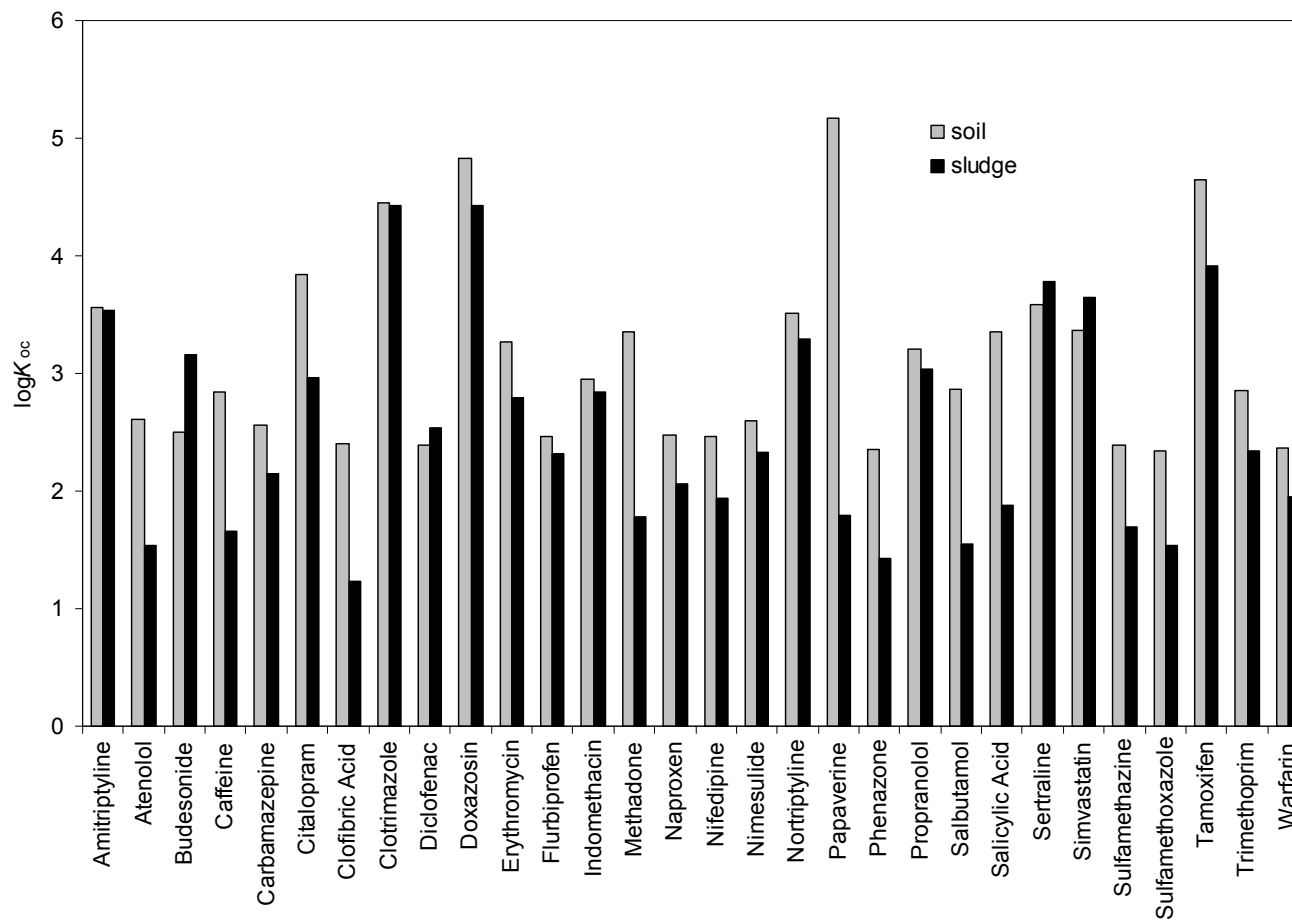

**Figure S5** Comparison of log<sub>10</sub> K<sub>oc</sub> for PPCPs in soil and sludge sorption experiments.

## S 8.0 Generation of molecular descriptors

The molecular descriptors outlined in Table S5 were generated using canonical simplified molecular input line entry specifications (SMILES). For example, amitriptyline has a SMILE of CN(C)CCC=C1C2=CC=CC=C2CCC3=CC=CC=C31. Using SMILES, QSAR data was generated using Parameter Client. Experimental  $pK_a$  and  $\log P$  values were sourced externally from literature cited data.

**Table S5.** Selection of molecular descriptors for neural network prediction of  $K_d$

| Compound Name   | Empirical Formula                                                             | $\log P^{Ref.}$    | MlogP | AlogP | $pK_a^{Ref.}$      | AMR   | TPS A | UI  | HF   | AR   | $\Sigma$ VWV | $\Sigma$ SAEN | $\Sigma$ AP | $\Sigma$ KHES |
|-----------------|-------------------------------------------------------------------------------|--------------------|-------|-------|--------------------|-------|-------|-----|------|------|--------------|---------------|-------------|---------------|
| Amitriptyline   | C <sub>20</sub> H <sub>23</sub> N                                             | 4.62 <sup>1</sup>  | 4.76  | 4.77  | 9.42 <sup>2</sup>  | 92.3  | 3.2   | 3.8 | -0.9 | 0.52 | 27.6         | 42.8          | 29.4        | 38.3          |
| Amphetamine     | C <sub>9</sub> H <sub>13</sub> N                                              | 1.83 <sup>3</sup>  | 2.24  | 1.64  | 9.80 <sup>4</sup>  | 43.7  | 26.0  | 2.8 | 0.6  | 0.60 | 13.6         | 22.4          | 14.6        | 20.5          |
| Atenolol        | C <sub>14</sub> H <sub>22</sub> N <sub>2</sub> O <sub>3</sub>                 | 0.16 <sup>5</sup>  | 0.93  | 0.67  | 9.20 <sup>5</sup>  | 73.5  | 84.6  | 3.0 | 2.0  | 0.32 | 23.5         | 41.0          | 25.0        | 47.2          |
| Benzoylecgonine | C <sub>16</sub> H <sub>19</sub> NO <sub>4</sub>                               | 1.29 <sup>6</sup>  | 2.17  | 1.87  | 11.20 <sup>7</sup> | 75.8  | 66.8  | 3.2 | -0.3 | 0.26 | 24.4         | 40.4          | 25.7        | 52.3          |
| Bezafibrate     | C <sub>19</sub> H <sub>20</sub> ClNO <sub>4</sub>                             | 4.25 <sup>8</sup>  | 3.39  | 3.84  | 3.60 <sup>9</sup>  | 95.5  | 75.6  | 3.9 | 0.3  | 0.46 | 28.7         | 45.6          | 30.3        | 64.4          |
| Budesonide      | C <sub>25</sub> H <sub>34</sub> O <sub>6</sub>                                | 3.60 <sup>10</sup> | 2.01  | 2.13  | -                  | 116.4 | 93.1  | 2.3 | 0.2  | 0.00 | 38.2         | 65.0          | 40.7        | 72.3          |
| Caffeine        | C <sub>8</sub> H <sub>10</sub> N <sub>4</sub> O <sub>2</sub>                  | -0.07 <sup>9</sup> | 0.74  | -0.10 | 14.00 <sup>9</sup> | 49.3  | 61.8  | 3.0 | -0.6 | 0.33 | 14.8         | 24.7          | 15.2        | 37.7          |
| Carbamazepine   | C <sub>15</sub> H <sub>12</sub> N <sub>2</sub> O                              | 2.45 <sup>9</sup>  | 2.59  | 2.68  | 13.90 <sup>9</sup> | 71.9  | 48.0  | 3.9 | 0.3  | 0.60 | 20.5         | 30.0          | 21.2        | 41.3          |
| Chloramphenicol | C <sub>11</sub> H <sub>12</sub> Cl <sub>2</sub> N <sub>2</sub> O <sub>5</sub> | 1.14 <sup>11</sup> | 1.23  | 1.02  | 5.50 <sup>12</sup> | 73.2  | 115.4 | 3.3 | 1.3  | 0.30 | 20.5         | 33.8          | 21.6        | 64.2          |
| Cimetidine      | C <sub>10</sub> H <sub>16</sub> N <sub>6</sub> S                              | 0.40 <sup>5</sup>  | 0.82  | 0.61  | 6.80 <sup>5</sup>  | 69.7  | 114.2 | 3.0 | 1.4  | 0.29 | 20.0         | 33.1          | 21.5        | 39.3          |
| Citalopram      | C <sub>20</sub> H <sub>21</sub> FN <sub>2</sub> O                             | 3.77 <sup>13</sup> | 3.30  | 3.72  | 9.50 <sup>14</sup> | 93.8  | 36.3  | 3.8 | -0.8 | 0.46 | 28.6         | 44.9          | 30.0        | 55.6          |

| Compound Name  | Empirical Formula                                               | log <i>P</i> (Ref.) | Mlog <i>P</i> | Alog <i>P</i> | p <i>K</i> <sub>a</sub> (Ref.) | AMR   | TPS A | UI  | HF   | AR   | Σ VWV | Σ SAEN | Σ AP | Σ KHES |
|----------------|-----------------------------------------------------------------|---------------------|---------------|---------------|--------------------------------|-------|-------|-----|------|------|-------|--------|------|--------|
| Clofibric Acid | C <sub>10</sub> H <sub>11</sub> ClO <sub>3</sub>                | 2.58 <sup>9</sup>   | 2.38          | 2.73          | 3.46 <sup>15</sup>             | 52.6  | 46.5  | 3.0 | -0.2 | 0.43 | 15.8  | 25.6   | 16.8 | 38.9   |
| Clotrimazole   | C <sub>22</sub> H <sub>17</sub> ClN <sub>2</sub>                | 6.12 <sup>9</sup>   | 4.93          | 5.22          | 6.12 <sup>9</sup>              | 102.1 | 17.8  | 4.6 | -0.9 | 0.82 | 29.5  | 41.6   | 31.0 | 51.0   |
| Cocaethylene   | C <sub>18</sub> H <sub>23</sub> NO <sub>4</sub>                 | -                   | 2.65          | 2.47          | -                              | 85.4  | 55.8  | 3.2 | -0.8 | 0.24 | 27.6  | 46.1   | 29.2 | 53.3   |
| Cocaine        | C <sub>17</sub> H <sub>21</sub> NO <sub>4</sub>                 | 2.39 <sup>16</sup>  | 2.41          | 2.12          | 8.60 <sup>17</sup>             | 80.7  | 55.8  | 3.2 | -0.8 | 0.25 | 26.0  | 43.3   | 27.4 | 51.8   |
| Diazepam       | C <sub>16</sub> H <sub>13</sub> ClN <sub>2</sub> O              | 2.86 <sup>18</sup>  | 3.36          | 3.39          | 3.46 <sup>19</sup>             | 80.0  | 32.6  | 3.9 | -0.8 | 0.55 | 22.8  | 33.2   | 23.9 | 45.6   |
| Diclofenac     | C <sub>14</sub> H <sub>11</sub> Cl <sub>2</sub> NO <sub>2</sub> | 4.15 <sup>9</sup>   | 3.99          | 4.35          | 4.40 <sup>20</sup>             | 75.5  | 49.3  | 3.8 | 0.4  | 0.60 | 21.0  | 30.7   | 22.2 | 49.2   |
| Doxazosin      | C <sub>23</sub> H <sub>25</sub> N <sub>5</sub> O <sub>5</sub>   | 2.09 <sup>21</sup>  | 1.32          | 2.59          | 6.93 <sup>22</sup>             | 121.7 | 112.3 | 4.3 | 0.3  | 0.46 | 36.5  | 59.0   | 37.9 | 74.8   |
| EDDP           | C <sub>9</sub> H <sub>11</sub> N                                | -                   | 4.37          | 4.47          | -                              | 91.4  | 3.2   | 3.8 | -0.9 | 0.52 | 27.6  | 42.8   | 29.4 | 39.1   |
| Erythromycin   | C <sub>37</sub> H <sub>67</sub> NO <sub>13</sub>                | 3.06 <sup>5</sup>   | -0.14         | 1.65          | 8.90 <sup>5</sup>              | 186.0 | 193.9 | 1.6 | 2.0  | 0.00 | 64.4  | 118.5  | 69.0 | 126.   |
| Flurbiprofen   | C <sub>15</sub> H <sub>13</sub> FO <sub>2</sub>                 | 4.16 <sup>9</sup>   | 3.90          | 3.66          | 4.33 <sup>9</sup>              | 67.3  | 37.3  | 3.8 | -0.3 | 0.63 | 20.3  | 31.4   | 21.2 | 48.7   |
| Indomethacin   | C <sub>19</sub> H <sub>16</sub> ClNO <sub>4</sub>               | 4.27 <sup>9</sup>   | 3.32          | 4.21          | 4.50 <sup>23</sup>             | 94.3  | 68.5  | 4.3 | -0.3 | 0.59 | 27.5  | 41.8   | 28.8 | 64.1   |
| Ketoprofen     | C <sub>16</sub> H <sub>14</sub> O <sub>3</sub>                  | 3.12 <sup>9</sup>   | 3.37          | 3.34          | 4.45 <sup>9</sup>              | 72.5  | 54.4  | 3.9 | -0.4 | 0.60 | 21.7  | 33.2   | 22.7 | 49.7   |
| MDMA           | C <sub>11</sub> H <sub>15</sub> NO <sub>2</sub>                 | -0.32 <sup>24</sup> | 1.67          | 1.84          | 9.90 <sup>25</sup>             | 54.3  | 30.5  | 2.8 | -0.2 | 0.40 | 17.2  | 28.9   | 18.2 | 28.8   |
| Methadone      | C <sub>21</sub> H <sub>27</sub> NO                              | 3.90 <sup>26</sup>  | 4.10          | 4.32          | 9.10 <sup>19</sup>             | 97.4  | 20.3  | 3.8 | -0.9 | 0.50 | 30.3  | 48.9   | 32.4 | 47.6   |
| Metoprolol     | C <sub>15</sub> H <sub>25</sub> NO <sub>3</sub>                 | 1.88 <sup>27</sup>  | 1.65          | 1.76          | 9.31 <sup>27</sup>             | 76.7  | 50.7  | 2.8 | 0.3  | 0.32 | 24.7  | 43.7   | 26.5 | 41.5   |
| Naproxen       | C <sub>14</sub> H <sub>14</sub> O <sub>3</sub>                  | 3.24 <sup>1</sup>   | 2.76          | 2.82          | 4.20 <sup>9</sup>              | 64.9  | 46.5  | 3.7 | -0.3 | 0.61 | 19.7  | 31.2   | 20.7 | 42.2   |
| Nifedipine     | C <sub>17</sub> H <sub>18</sub> N <sub>2</sub> O <sub>6</sub>   | 3.17 <sup>28</sup>  | 2.07          | 1.77          | 1.00 <sup>29</sup>             | 92.2  | 110.5 | 3.7 | -0.2 | 0.23 | 26.8  | 44.2   | 27.8 | 70.1   |

| Compound Name    | Empirical Formula                                               | log <i>P</i> (Ref.) | Mlog <i>P</i> | Alog <i>P</i> | p <i>K</i> <sub>a</sub> (Ref.) | AMR   | TPS A | UI  | HF   | AR   | Σ VWV | Σ SAEN | Σ AP | Σ KHES |
|------------------|-----------------------------------------------------------------|---------------------|---------------|---------------|--------------------------------|-------|-------|-----|------|------|-------|--------|------|--------|
| Nimesulide       | C <sub>13</sub> H <sub>12</sub> N <sub>2</sub> O <sub>5</sub> S | 2.60 <sup>30</sup>  | 2.11          | 2.67          | 6.50 <sup>30</sup>             | 78.5  | 109.6 | 4.1 | -0.2 | 0.55 | 21.6  | 34.3   | 22.7 | 61.6   |
| Nortryptiline    | C <sub>19</sub> H <sub>21</sub> N                               | 4.39 <sup>1</sup>   | 4.53          | 4.24          | 9.70 <sup>31</sup>             | 87.0  | 12.0  | 3.8 | -0.5 | 0.55 | 26.0  | 39.9   | 27.6 | 36.8   |
| Papaverine       | C <sub>20</sub> H <sub>21</sub> NO <sub>4</sub>                 | 3.00 <sup>32</sup>  | 2.44          | 3.50          | 8.07 <sup>33</sup>             | 95.5  | 49.8  | 4.2 | -0.8 | 0.63 | 29.0  | 46.3   | 30.4 | 53.8   |
| Paracetamol      | C <sub>8</sub> H <sub>9</sub> NO <sub>2</sub>                   | 0.46 <sup>9</sup>   | 1.06          | 0.68          | 9.38 <sup>2</sup>              | 40.8  | 49.3  | 3.0 | 0.7  | 0.55 | 12.4  | 20.3   | 13.0 | 30.5   |
| Phenazone        | C <sub>11</sub> H <sub>12</sub> N <sub>2</sub> O                | 0.17 <sup>34</sup>  | 2.31          | 1.62          | 1.45 <sup>2</sup>              | 56.9  | 26.9  | 3.2 | -0.8 | 0.40 | 16.5  | 26.0   | 17.3 | 32.0   |
| Propranolol      | C <sub>16</sub> H <sub>21</sub> NO <sub>2</sub>                 | 3.48 <sup>9</sup>   | 2.53          | 2.54          | 9.49 <sup>9</sup>              | 76.8  | 41.5  | 3.6 | 0.3  | 0.55 | 24.0  | 39.6   | 25.5 | 40.7   |
| Ranitidine       | C <sub>13</sub> H <sub>22</sub> N <sub>4</sub> O <sub>3</sub> S | 0.15 <sup>35</sup>  | 0.66          | 1.47          | 8.20 <sup>36</sup>             | 85.1  | 111.6 | 3.2 | 0.5  | 0.24 | 25.0  | 43.4   | 26.9 | 51.3   |
| Salbutamol       | C <sub>13</sub> H <sub>21</sub> NO <sub>3</sub>                 | 0.11 <sup>37</sup>  | 1.13          | 0.92          | 5.90 <sup>9</sup>              | 67.5  | 72.7  | 2.8 | 2.1  | 0.35 | 21.5  | 37.9   | 23.0 | 43.1   |
| Salicylic Acid   | C <sub>7</sub> H <sub>6</sub> O <sub>3</sub>                    | 2.36 <sup>9</sup>   | 1.64          | 1.17          | 3.50 <sup>9</sup>              | 34.5  | 57.5  | 3.0 | 0.7  | 0.60 | 10.3  | 16.6   | 10.7 | 32.0   |
| Sertraline       | C <sub>17</sub> H <sub>17</sub> NCl <sub>2</sub>                | 4.30 <sup>38</sup>  | 5.15          | 5.00          | 9.16 <sup>38</sup>             | 85.7  | 12.0  | 3.7 | -0.4 | 0.55 | 24.8  | 36.7   | 26.6 | 40.7   |
| Simvastatin      | C <sub>25</sub> H <sub>38</sub> O <sub>5</sub>                  | 4.68 <sup>39</sup>  | 4.00          | 4.64          | 5.50 <sup>40</sup>             | 117.7 | 72.8  | 2.3 | -0.4 | 0.00 | 38.9  | 67.4   | 41.7 | 67.6   |
| Sulfamethazine   | C <sub>12</sub> H <sub>14</sub> N <sub>4</sub> O <sub>2</sub> S | 0.89 <sup>9</sup>   | 1.06          | 1.35          | 7.40 <sup>41, a</sup>          | 75.2  | 106.4 | 3.9 | 1.3  | 0.60 | 21.1  | 33.6   | 22.4 | 49.8   |
| Sulfamethoxazole | C <sub>10</sub> H <sub>11</sub> N <sub>3</sub> O <sub>3</sub> S | 0.89 <sup>9</sup>   | 0.97          | 1.18          | 5.60 <sup>12</sup>             | 65.9  | 106.6 | 3.8 | 1.4  | 0.61 | 18.0  | 28.9   | 19.1 | 46.6   |
| Sulfapyridine    | C <sub>11</sub> H <sub>11</sub> N <sub>3</sub> O <sub>2</sub> S | 0.02 <sup>34</sup>  | 1.15          | 1.43          | 8.40 <sup>41, a</sup>          | 67.5  | 93.5  | 3.9 | 1.3  | 0.67 | 18.5  | 28.6   | 19.6 | 45.4   |
| Tamoxifen        | C <sub>26</sub> H <sub>29</sub> NO                              | 6.58 <sup>42</sup>  | 5.20          | 6.32          | 8.85 <sup>43</sup>             | 119.2 | 12.5  | 4.3 | -0.9 | 0.60 | 35.9  | 55.8   | 38.1 | 54.0   |
| Temazepam        | C <sub>16</sub> H <sub>13</sub> ClN <sub>2</sub> O <sub>2</sub> | 2.19 <sup>44</sup>  | 3.36          | 3.05          | 1.60 <sup>44</sup>             | 80.9  | 52.9  | 3.9 | -0.3 | 0.52 | 23.3  | 34.5   | 24.4 | 51.4   |
| Tramadol         | C <sub>16</sub> H <sub>25</sub> NO <sub>2</sub>                 | 2.51 <sup>45</sup>  | 2.32          | 2.70          | 9.19 <sup>45</sup>             | 78.3  | 32.7  | 2.8 | -0.4 | 0.30 | 25.2  | 43.4   | 27.1 | 38.9   |

| Compound Name | Empirical Formula                                               | log <i>P</i> (Ref.) | Mlog <i>P</i> | Alog <i>P</i> | p <i>K</i> <sub>a</sub> (Ref.) | AMR  | TPS A | UI  | HF   | AR   | Σ VWV | Σ SAEN | Σ AP | Σ KHES |
|---------------|-----------------------------------------------------------------|---------------------|---------------|---------------|--------------------------------|------|-------|-----|------|------|-------|--------|------|--------|
| Triclocarban  | C <sub>13</sub> H <sub>9</sub> Cl <sub>3</sub> N <sub>2</sub> O | 4.90 <sup>46</sup>  | 3.99          | 4.52          | 12.77 <sup>47</sup>            | 76.9 | 41.1  | 3.8 | 0.5  | 0.60 | 20.6  | 28.9   | 21.9 | 48.3   |
| Triclosan     | C <sub>12</sub> H <sub>7</sub> Cl <sub>3</sub> O <sub>2</sub>   | 4.53 <sup>48</sup>  | 3.84          | 5.12          | 8.10 <sup>49</sup>             | 68.4 | 29.5  | 3.7 | -0.2 | 0.67 | 18.1  | 25.0   | 19.3 | 43.8   |
| Trimethoprim  | C <sub>14</sub> H <sub>18</sub> N <sub>4</sub> O <sub>3</sub>   | 0.91 <sup>9</sup>   | 1.26          | 1.54          | 6.60 <sup>9</sup>              | 81.5 | 105.5 | 3.7 | 2.0  | 0.55 | 23.7  | 39.6   | 24.7 | 49.7   |
| Warfarin      | C <sub>19</sub> H <sub>16</sub> O <sub>4</sub>                  | 2.60 <sup>9</sup>   | 2.80          | 3.13          | 5.05 <sup>9</sup>              | 85.8 | 67.5  | 4.0 | -0.4 | 0.48 | 25.8  | 39.4   | 26.9 | 58.0   |

<sup>a</sup> Molecule with two or more reported p*K*<sub>a</sub> values. Values chosen as inputs were those closest to pH of soil/sludge-water mixture.



- 1 Ghasemi, J., Saaaidpour, S., *Anal. Chim. Acta* 2007, **604**, 99.
- 2 Escuder-Gilabert, L., Molero-Monfort, M., Villanueva-Camañas, R.M., Sagrado, S., Medina-Hernández, M.J., *J. Chromatogr. B* 2004, **807**, 193.
- 3 Nishida, M., Yashiki, M., Namera, A., Kimura, K., *J. Chromatogr. B* 2006, **842**, 106.
- 4 FDA Adderall XR Capsules Product Information, 2006, [www.fda.gov/cder/foi/label2005/0213035009lbl.pdf](http://www.fda.gov/cder/foi/label2005/0213035009lbl.pdf)
- 5 Jones, O.A.H., Voulvoulis, N., Lester, J.N., *Wat. Res.* 2002, **36**, 5013.
- 6 HIV/OI Chemical Biological Database, 2006, Bezoylecgonine Information,  
[http://chembd2.niaid.nih.gov/struct\\_search/all/url\\_search.asp?aids\\_no-001987](http://chembd2.niaid.nih.gov/struct_search/all/url_search.asp?aids_no-001987)
- 7 Skopp, G., Potsch, L., *Int. J. Leg. Med.* 1999, **112**, 213.
- 8 Paschke, A., Bruemmer, J., *Anal. Bioanal. Chem.* 2007, **387**, 1417.
- 9 Bones, J., Thomas, K., Nesterenko, P.N., Paull, B., *Talanta* 2006, **70**, 1117.
- 10 Nolen, H., Fedorak, R.N., Friend, D.R., *J. Pharm. Sci.* 1995, **84**, 677.
- 11 Hansch, C., Leo, A., 1987.
- 12 Martindale, W., *The Extra Pharmacopoeia*, The Pharmaceutical Press, London, 1993.
- 13 Rampono, J., Kristensen, J.H., Hackett, L.P., Paech, M., Rolland, K., Ilett, K.F., *Brit. J. Clin. Pharmaco.* 2000, **50**, 263.
- 14 Kwon, J.-W., Armbrust, K.L., *B. Environ. Contam. Tox.* 2008, DOI 10.1007/s00128-008-9401-1.
- 15 Witiak, D.T., Feller, D.R., Stratford, E.S., Hackney, R.E., Nazareth, R., Wagner, G., *Med. Chem.* 1971, **14**, 754.
- 16 Cone, E.J., Huestis, M.A., *Oral-Based Diagnostics* 2007, **1098**, 51.
- 17 Barkley Barnett, L., Toxicity, cocaine,  
<http://www.medscape.com/px/trk.svr/emedsearch?exturl=http://www.emedicine.com/emerg/TOPIC102.HTM>
- 18 Kontoyannis, S., Antimisiaris, D., Douroumis, D., *Talanta* 1999, **48**, 979.
- 19 Roerig, D.L., Dahl, R.R., Dawson, C.A., Warp, R.I., *Drug Metab. Dispos.* 1984, **12**, 536.
- 20 LaRotonda, M.I., Amato, G., Barbato, F., Silipo, C., Vittoria, A., *Chem. Biol.* 1983, **2**, 168.
- 21 Negwer, M., *Organic Chemical Drugs and their Synonyms*, Akademie, Berlin, 1987.
- 22 Astra Zeneca, 2006, Product Monograph, [http://www.astrazeneca.ca/documents/ProductPortfolio/CARDURA\\_PM\\_en.pdf](http://www.astrazeneca.ca/documents/ProductPortfolio/CARDURA_PM_en.pdf)
- 23 Kavvada, K.M., Murray, J.G., Moore, V.A., Coombes, A.G.A., Hanson, P.J., *Eur. J. Pharmacol.* 2006, **549**, 41.
- 24 Seidel, S., Singer, E.S., Just, H., Farhan, H., Scholze, P., Kudlacek, O., Holy, M., Koppatz, K., Kirvanek, M., Freissmuth, M., Sitte, H.H., *Mol. Pharmacol.* 2005, **67**, 140.
- 25 Pirichini, S., Distribution of 3, 4-Methylenedioxy Methamphetamine in non-conventional matrices and its application in clinical toxicology, Universitat Autònoma de Barcelona, Doctoral Thesis, 2005

- 26 Nekhayeva, I.A., Nanovskaya, T.N., Deshmukh, S.V., Zharikova, O.L., Hankins, G.D.V., Ahmed, M.S., *Biochem. Pharmacol.* 2005, **69**, 187.
- 27 Carda-Broch, S., Berthod, A., *J. Chromatogr. A* 2003, **995**, 55.
- 28 Lombardo, F., Shalaeva, M.Y., Tupper, K.A., Gao, F., *J. Med. Chem.* 2001, **44**, 2490.
- 29 Knock, G.A., Aaronson, P.I., *Brit. J. Pharmacol.* 1999, **127**, 1470.
- 30 Alves, M.P., Scarrone, A.L., Santos, M., Pohlmann, A.R., Guterres, S.S., *Int. J. Pharm.* 2007, **341**, 215.
- 31 Croes, K., McCarthy, P.T., Flanagan, R.J., *J. Chromatogr. A* 1995, **693**, 289.
- 32 Virtual Computational Chemistry Laboratory logP Calculator, <http://146.107.217.178/lab/alogps/start.html>
- 33 Choe, H., Lee, Y.-K., Lee, Y.-T., Choe, H., Ko, S.-H., Joo, C.-U., Kim, M.-H., Kim, G.-S., Eun, J.-S., Kim, J.-H., Chae, S.-W., Kwak, Y.-G., *J. Pharmacol. Exp. Ther.* 2003, **304**, 706.
- 34 Liu, X., Tanaka, H., Yamauchi, A., Testa, B., Chuman, H., *J. Chromatogr. A* 2005, **1091**, 51.
- 35 Zakeri-Milani, P., Tajerzadeh, H., Islambolchilar, Z., Barzegar, S., Valizadeh, H., *DARU* 2006, **14**, 164.
- 36 Campanero, M.A., Lopez-Orcariz, A., Garcia-Quetglas, E., Sadaba, B., de la Maza, A., *Chromatographia* 1998, **78**, 391.
- 37 Forbes, B., Shah, A., Martin, G.P., Lansley, A.B., *International Journal of Pharmaceutics* 2003, **257**, 161.
- 38 Deak, K., Takacs-Novak, K., Tihanyi, K., Noszal, B., *Med. Chem.* 2006, **2**, 385.
- 39 Serajuddin, A.T.M., Ranadive, S.A., Mahoney, E.M., *J. Pharm. Sci.* 1991, **80**, 830.
- 40 Vanderbist, F., Sereno, A., Baudier, A., ORAL PHARMACEUTICAL COMPOSITION CONTAINING A STATIN DERIVATIVE, European Patent EP1395254, 2007, <http://www.freepatentsonline.com/EP1395254B1.html>
- 41 Chienthavorn, O., Smith, R.M., *Chromatographia* 1999, **50**, 485.
- 42 Nadanaciva, S., Bernal, A., Aggeler, R., Capaldi, R., Will, Y., *Toxicol. in Vitro* 2007, **21**, 902.
- 43 Astra Zeneca, 2002, Nolvadex (Tamoxifen Citrate), <http://www.fda.gov/cder/pediatric/labels/Tamoxifen.pdf>
- 44 Graf, E., El-Menshaway, M., *Pharm. Unserer Zeit* 1977, **6**, 171.
- 45 Tsai, R.S., Carrupt, P.A., Testa, B., El Tayar, N., Grunewald, G.L., Casy, A.F., *J. Chem. Res.* 1993, **8**, 1901.
- 46 Duan, M.S., Zhao, N., Össurardóttir, Í.B., Thorsteinsson, T., Loftsson, T., *Int. J. Pharm.* 2005, **297**, 213.
- 47 Chu, S., Metcalfe, C.D., *J. Chromatogr. A* 2007, **1164**, 212.
- 48 Hagedorn-Leweke, U., Lippold, B.C., *Pharmaceut. Res.* 1995, **12**, 1354.
- 49 Tixier, C., Singer, H.P., Canonica, S., Mueller, S.R., *Environ. Sci. Technol.* 2002, **36**, 3482.

## S 9.0 Network Architecture

**Figure S6.** Optimized tri-layer neural network for the prediction of  $K_d$  in soils and sludges.

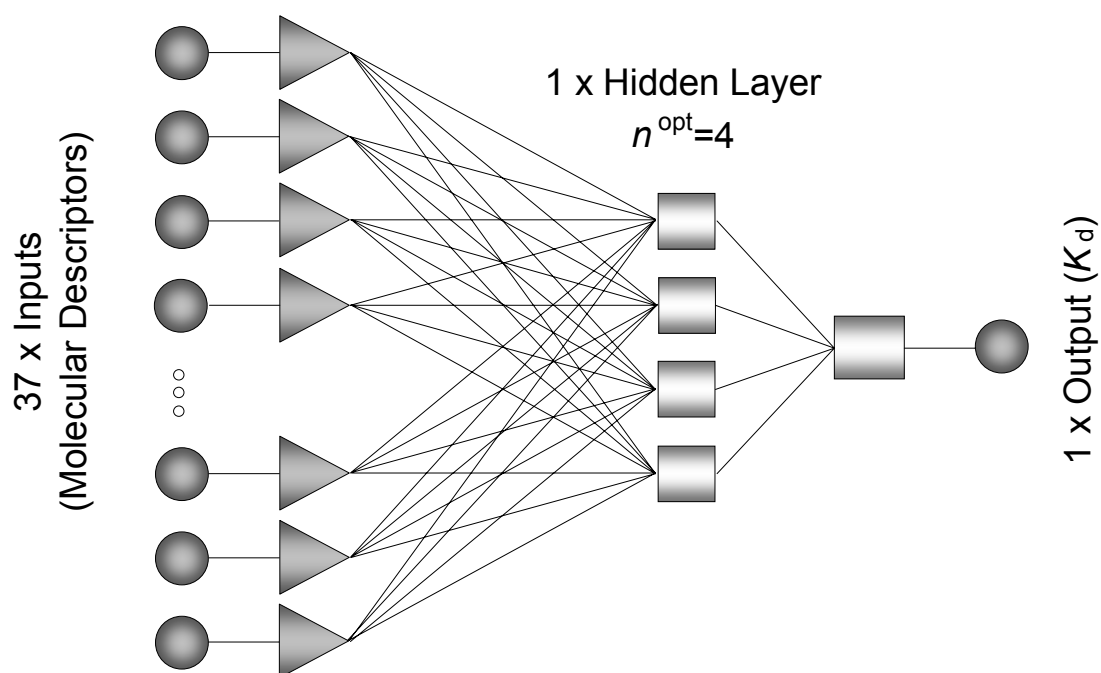

Supplement: b817822d.pdf [file b817822d.pdf]
